# Supplementary material for: Evaluation and refinement of the PRESTARt tool for identifying 12–14 year olds at high lifetime risk of developing type 2 diabetes compared to a clinicians assessment of risk: a cross-sectional study
Source: BMC Endocr Disord. 2019 Jul 25;19:79. doi: 10.1186/s12902-019-0410-3 (PMC6659313; doi:10.1186/s12902-019-0410-3)
Supplement: Supplementary file 1 — This file includes the Case report form which was used to capture data from participants. (PDF 1100 kb) [file 12902_2019_410_MOESM1_ESM.pdf]

# PRE-STARt : Phenotyping Study

## Case Report Form (Version 1 10.06.2015)

Participant Study ID: PHEN – X – 000      Date of Clinic Visit: DD – MM – YYYY

### **PERSONAL DETAILS CHECK**

Are the contact details correct?

Yes ☐

No ☐ - please check that the correct participant file is being used before completing a new contact sheet

Gender of the participant:

Male ☐

Female ☐

Date of birth of the participant:

DD - MM - YYYY

Age:

YY - MM

**INCLUSION CRITERIA** – An answer of **YES** must be given to all of the following questions for the participant to be eligible.

|                                                                  |   |   |
|------------------------------------------------------------------|---|---|
| Do they have a good understanding of written and verbal English? | Y | N |
| Has their parent/guardian provided consent?                      | Y | N |
| Has the child provided assent?                                   | Y | N |
| Are they aged between 12 and 14 years old (inclusive)?           | Y | N |

**EXCLUSION CRITERIA** – An answer of **NO** must be given to the following for the participant to be eligible.

|                                                                 |   |   |
|-----------------------------------------------------------------|---|---|
| Does the child have existing Type 1 or Type 2 Diabetes Mellitus | Y | N |
|-----------------------------------------------------------------|---|---|

Participant Study ID: PHEN - ☐ - ☐☐☐

Completed by: \_\_\_\_\_ Date: \_\_\_\_\_

**ETHNICITY** – Please tick the box that best describes the participant's and parents' ethnic origin.

|                            | Child                    | Mother                   | Father                   |
|----------------------------|--------------------------|--------------------------|--------------------------|
| White                      |                          |                          |                          |
| White British              | <input type="checkbox"/> | <input type="checkbox"/> | <input type="checkbox"/> |
| White Irish                | <input type="checkbox"/> | <input type="checkbox"/> | <input type="checkbox"/> |
| Other White background     | <input type="checkbox"/> | <input type="checkbox"/> | <input type="checkbox"/> |
| Mixed                      |                          |                          |                          |
| White and Black Caribbean  | <input type="checkbox"/> | <input type="checkbox"/> | <input type="checkbox"/> |
| White and Black African    | <input type="checkbox"/> | <input type="checkbox"/> | <input type="checkbox"/> |
| White and Asian            | <input type="checkbox"/> | <input type="checkbox"/> | <input type="checkbox"/> |
| Any other mixed race       | <input type="checkbox"/> | <input type="checkbox"/> | <input type="checkbox"/> |
| Asian or Asian British     |                          |                          |                          |
| Indian                     | <input type="checkbox"/> | <input type="checkbox"/> | <input type="checkbox"/> |
| Pakistani                  | <input type="checkbox"/> | <input type="checkbox"/> | <input type="checkbox"/> |
| Bangladeshi                | <input type="checkbox"/> | <input type="checkbox"/> | <input type="checkbox"/> |
| Any other Asian background | <input type="checkbox"/> | <input type="checkbox"/> | <input type="checkbox"/> |
| Black or Black British     |                          |                          |                          |
| Caribbean                  | <input type="checkbox"/> | <input type="checkbox"/> | <input type="checkbox"/> |
| African                    | <input type="checkbox"/> | <input type="checkbox"/> | <input type="checkbox"/> |
| Any other Black background | <input type="checkbox"/> | <input type="checkbox"/> | <input type="checkbox"/> |
| Chinese                    |                          |                          |                          |
| Chinese                    | <input type="checkbox"/> | <input type="checkbox"/> | <input type="checkbox"/> |
| Other                      |                          |                          |                          |
| Other Ethnic group         | <input type="checkbox"/> | <input type="checkbox"/> | <input type="checkbox"/> |
| Specify                    |                          |                          |                          |

**What your relation is to the participant?**

Mother ☐ Father ☐ Aunt ☐ Uncle ☐ Grandmother ☐ Grandfather ☐  
 Brother ☐ Sister ☐ Non-biologically related guardian ☐

Other please specify \_\_\_\_\_

**FAMILY HISTORY** – Please indicate whether family member(s) of the participant (young person) have had a physician diagnosis of the following conditions. Please indicate the age at which they first presented with the condition(s). Please tick ‘Unk’ for cases where the presence of a condition is not known and write ‘Unk’ next to Age when the age of onset is not known.

|                      | Heart Disease                                                                                      | High Cholesterol                                                                                   | Cardiovascular Disease                                                                             | Type 1 Diabetes                                                                                    | Type 2 Diabetes                                                                                    | Other (please give details)                                                                              |
|----------------------|----------------------------------------------------------------------------------------------------|----------------------------------------------------------------------------------------------------|----------------------------------------------------------------------------------------------------|----------------------------------------------------------------------------------------------------|----------------------------------------------------------------------------------------------------|----------------------------------------------------------------------------------------------------------|
| Maternal Grandfather | Y <input type="checkbox"/> N <input type="checkbox"/><br>Unk <input type="checkbox"/><br>Age _____ | Y <input type="checkbox"/> N <input type="checkbox"/><br>Unk <input type="checkbox"/><br>Age _____ | Y <input type="checkbox"/> N <input type="checkbox"/><br>Unk <input type="checkbox"/><br>Age _____ | Y <input type="checkbox"/> N <input type="checkbox"/><br>Unk <input type="checkbox"/><br>Age _____ | Y <input type="checkbox"/> N <input type="checkbox"/><br>Unk <input type="checkbox"/><br>Age _____ | Y <input type="checkbox"/> _____<br>N <input type="checkbox"/> Unk <input type="checkbox"/><br>Age _____ |
| Maternal Grandmother | Y <input type="checkbox"/> N <input type="checkbox"/><br>Unk <input type="checkbox"/><br>Age _____ | Y <input type="checkbox"/> N <input type="checkbox"/><br>Unk <input type="checkbox"/><br>Age _____ | Y <input type="checkbox"/> N <input type="checkbox"/><br>Unk <input type="checkbox"/><br>Age _____ | Y <input type="checkbox"/> N <input type="checkbox"/><br>Unk <input type="checkbox"/><br>Age _____ | Y <input type="checkbox"/> N <input type="checkbox"/><br>Unk <input type="checkbox"/><br>Age _____ | Y <input type="checkbox"/> _____<br>N <input type="checkbox"/> Unk <input type="checkbox"/><br>Age _____ |
| Paternal Grandfather | Y <input type="checkbox"/> N <input type="checkbox"/><br>Unk <input type="checkbox"/><br>Age _____ | Y <input type="checkbox"/> N <input type="checkbox"/><br>Unk <input type="checkbox"/><br>Age _____ | Y <input type="checkbox"/> N <input type="checkbox"/><br>Unk <input type="checkbox"/><br>Age _____ | Y <input type="checkbox"/> N <input type="checkbox"/><br>Unk <input type="checkbox"/><br>Age _____ | Y <input type="checkbox"/> N <input type="checkbox"/><br>Unk <input type="checkbox"/><br>Age _____ | Y <input type="checkbox"/> _____<br>N <input type="checkbox"/> Unk <input type="checkbox"/><br>Age _____ |
| Paternal Grandmother | Y <input type="checkbox"/> N <input type="checkbox"/><br>Unk <input type="checkbox"/><br>Age _____ | Y <input type="checkbox"/> N <input type="checkbox"/><br>Unk <input type="checkbox"/><br>Age _____ | Y <input type="checkbox"/> N <input type="checkbox"/><br>Unk <input type="checkbox"/><br>Age _____ | Y <input type="checkbox"/> N <input type="checkbox"/><br>Unk <input type="checkbox"/><br>Age _____ | Y <input type="checkbox"/> N <input type="checkbox"/><br>Unk <input type="checkbox"/><br>Age _____ | Y <input type="checkbox"/> _____<br>N <input type="checkbox"/> Unk <input type="checkbox"/><br>Age _____ |
| Mother               | Y <input type="checkbox"/> N <input type="checkbox"/><br>Unk <input type="checkbox"/><br>Age _____ | Y <input type="checkbox"/> N <input type="checkbox"/><br>Unk <input type="checkbox"/><br>Age _____ | Y <input type="checkbox"/> N <input type="checkbox"/><br>Unk <input type="checkbox"/><br>Age _____ | Y <input type="checkbox"/> N <input type="checkbox"/><br>Unk <input type="checkbox"/><br>Age _____ | Y <input type="checkbox"/> N <input type="checkbox"/><br>Unk <input type="checkbox"/><br>Age _____ | Y <input type="checkbox"/> _____<br>N <input type="checkbox"/> Unk <input type="checkbox"/><br>Age _____ |
| Father               | Y <input type="checkbox"/> N <input type="checkbox"/><br>Unk <input type="checkbox"/><br>Age _____ | Y <input type="checkbox"/> N <input type="checkbox"/><br>Unk <input type="checkbox"/><br>Age _____ | Y <input type="checkbox"/> N <input type="checkbox"/><br>Unk <input type="checkbox"/><br>Age _____ | Y <input type="checkbox"/> N <input type="checkbox"/><br>Unk <input type="checkbox"/><br>Age _____ | Y <input type="checkbox"/> N <input type="checkbox"/><br>Unk <input type="checkbox"/><br>Age _____ | Y <input type="checkbox"/> _____<br>N <input type="checkbox"/> Unk <input type="checkbox"/><br>Age _____ |

**FAMILY HISTORY (CONTINUED)** – Please indicate whether family member(s) of the participant (young person) have had a physician diagnosis of the following conditions. Please indicate the age at which they first presented with the condition(s). Please tick ‘Unk’ for cases where the presence of a condition is not known and write ‘Unk’ next to Age when the age of onset is not known.

|                                           | Heart Disease                                                                                      | High Cholesterol                                                                                   | Cardiovascular Disease                                                                             | Type 1 Diabetes                                                                                    | Type 2 Diabetes                                                                                    | Other (please give details)                                                                              |
|-------------------------------------------|----------------------------------------------------------------------------------------------------|----------------------------------------------------------------------------------------------------|----------------------------------------------------------------------------------------------------|----------------------------------------------------------------------------------------------------|----------------------------------------------------------------------------------------------------|----------------------------------------------------------------------------------------------------------|
| Sibling 1<br>N/A <input type="checkbox"/> | Y <input type="checkbox"/> N <input type="checkbox"/><br>Unk <input type="checkbox"/><br>Age _____ | Y <input type="checkbox"/> N <input type="checkbox"/><br>Unk <input type="checkbox"/><br>Age _____ | Y <input type="checkbox"/> N <input type="checkbox"/><br>Unk <input type="checkbox"/><br>Age _____ | Y <input type="checkbox"/> N <input type="checkbox"/><br>Unk <input type="checkbox"/><br>Age _____ | Y <input type="checkbox"/> N <input type="checkbox"/><br>Unk <input type="checkbox"/><br>Age _____ | Y <input type="checkbox"/> _____<br>N <input type="checkbox"/> Unk <input type="checkbox"/><br>Age _____ |
| Sibling 2<br>N/A <input type="checkbox"/> | Y <input type="checkbox"/> N <input type="checkbox"/><br>Unk <input type="checkbox"/><br>Age _____ | Y <input type="checkbox"/> N <input type="checkbox"/><br>Unk <input type="checkbox"/><br>Age _____ | Y <input type="checkbox"/> N <input type="checkbox"/><br>Unk <input type="checkbox"/><br>Age _____ | Y <input type="checkbox"/> N <input type="checkbox"/><br>Unk <input type="checkbox"/><br>Age _____ | Y <input type="checkbox"/> N <input type="checkbox"/><br>Unk <input type="checkbox"/><br>Age _____ | Y <input type="checkbox"/> _____<br>N <input type="checkbox"/> Unk <input type="checkbox"/><br>Age _____ |
| Sibling 3<br>N/A <input type="checkbox"/> | Y <input type="checkbox"/> N <input type="checkbox"/><br>Unk <input type="checkbox"/><br>Age _____ | Y <input type="checkbox"/> N <input type="checkbox"/><br>Unk <input type="checkbox"/><br>Age _____ | Y <input type="checkbox"/> N <input type="checkbox"/><br>Unk <input type="checkbox"/><br>Age _____ | Y <input type="checkbox"/> N <input type="checkbox"/><br>Unk <input type="checkbox"/><br>Age _____ | Y <input type="checkbox"/> N <input type="checkbox"/><br>Unk <input type="checkbox"/><br>Age _____ | Y <input type="checkbox"/> _____<br>N <input type="checkbox"/> Unk <input type="checkbox"/><br>Age _____ |
| Sibling 4<br>N/A <input type="checkbox"/> | Y <input type="checkbox"/> N <input type="checkbox"/><br>Unk <input type="checkbox"/><br>Age _____ | Y <input type="checkbox"/> N <input type="checkbox"/><br>Unk <input type="checkbox"/><br>Age _____ | Y <input type="checkbox"/> N <input type="checkbox"/><br>Unk <input type="checkbox"/><br>Age _____ | Y <input type="checkbox"/> N <input type="checkbox"/><br>Unk <input type="checkbox"/><br>Age _____ | Y <input type="checkbox"/> N <input type="checkbox"/><br>Unk <input type="checkbox"/><br>Age _____ | Y <input type="checkbox"/> _____<br>N <input type="checkbox"/> Unk <input type="checkbox"/><br>Age _____ |

**MEDICAL HISTORY** – Please provide the following information and give details where possible.

Has the participant ever been in hospital?

No ☐

Yes ☐ - please provide details below

| Reason for hospital visit/admission        | Dates    |
|--------------------------------------------|----------|
| e.g., Bike accident – fractured left wrist | Aug 2010 |
|                                            |          |
|                                            |          |
|                                            |          |
|                                            |          |
|                                            |          |

Is the participant taking any **prescription medications**?

No, the participant is not taking any prescription medications ☐

Yes ☐ - please provide details below

| Name of medication | Dose  | How many doses are taken at the following times?                                                                    |
|--------------------|-------|---------------------------------------------------------------------------------------------------------------------|
| e.g., Ventolin     | 100mg | <u>  1  </u> morning <u>  0  </u> noon <u>  0  </u> afternoon <u>  0  </u> night <input type="checkbox"/> as needed |
|                    |       | <u>    </u> morning <u>    </u> noon <u>    </u> afternoon <u>    </u> night <input type="checkbox"/> as needed     |
|                    |       | <u>    </u> morning <u>    </u> noon <u>    </u> afternoon <u>    </u> night <input type="checkbox"/> as needed     |
|                    |       | <u>    </u> morning <u>    </u> noon <u>    </u> afternoon <u>    </u> night <input type="checkbox"/> as needed     |
|                    |       | <u>    </u> morning <u>    </u> noon <u>    </u> afternoon <u>    </u> night <input type="checkbox"/> as needed     |
|                    |       | <u>    </u> morning <u>    </u> noon <u>    </u> afternoon <u>    </u> night <input type="checkbox"/> as needed     |

Is the participant taking any **over-the-counter** medications?

No, the participant is not taking any over-the-counter medications ☐

Yes ☐ - please provide details below

| Name of medication | Dose | How many doses are taken at the following times                                                         |
|--------------------|------|---------------------------------------------------------------------------------------------------------|
| e.g., Iron tablets | 40mg | <u>1</u> morning <u>0</u> noon <u>0</u> afternoon <u>0</u> night <input type="checkbox"/> as needed     |
|                    |      | <u>  </u> morning <u>  </u> noon <u>  </u> afternoon <u>  </u> night <input type="checkbox"/> as needed |
|                    |      | <u>  </u> morning <u>  </u> noon <u>  </u> afternoon <u>  </u> night <input type="checkbox"/> as needed |
|                    |      | <u>  </u> morning <u>  </u> noon <u>  </u> afternoon <u>  </u> night <input type="checkbox"/> as needed |
|                    |      | <u>  </u> morning <u>  </u> noon <u>  </u> afternoon <u>  </u> night <input type="checkbox"/> as needed |
|                    |      | <u>  </u> morning <u>  </u> noon <u>  </u> afternoon <u>  </u> night <input type="checkbox"/> as needed |

Is the participant **allergic (has a bad reaction)** to anything, for example; pollen, penicillin, soya? ☐ Y ☐ N

If yes please provide details below

| Allergic to  | What happens?               |
|--------------|-----------------------------|
| e.g., Pollen | Sore itchy eyes, runny nose |
|              |                             |
|              |                             |
|              |                             |
|              |                             |
|              |                             |

Has the participant ever suffered from any of the following conditions? Please tick 'Unknown' for cases when the information is not available.

| Condition                                                                                                   |                                                                                    |
|-------------------------------------------------------------------------------------------------------------|------------------------------------------------------------------------------------|
| Acanthosis Nigricans (i.e., dark, thickened patches of skin)                                                | Y <input type="checkbox"/> N <input type="checkbox"/> Unk <input type="checkbox"/> |
| ADD/ADHA (i.e., problems paying attention, sitting still)                                                   | Y <input type="checkbox"/> N <input type="checkbox"/> Unk <input type="checkbox"/> |
| Back problems (i.e., crooked back, back pain)                                                               | Y <input type="checkbox"/> N <input type="checkbox"/> Unk <input type="checkbox"/> |
| Hearing problems                                                                                            | Y <input type="checkbox"/> N <input type="checkbox"/> Unk <input type="checkbox"/> |
| High blood pressure                                                                                         | Y <input type="checkbox"/> N <input type="checkbox"/> Unk <input type="checkbox"/> |
| High cholesterol                                                                                            | Y <input type="checkbox"/> N <input type="checkbox"/> Unk <input type="checkbox"/> |
| Jaundice (i.e., yellow skin)                                                                                | Y <input type="checkbox"/> N <input type="checkbox"/> Unk <input type="checkbox"/> |
| Muscle and bone problems (i.e., weak muscles, joint pain)                                                   | Y <input type="checkbox"/> N <input type="checkbox"/> Unk <input type="checkbox"/> |
| Obstructive sleep apnoea (i.e., stops breathing or struggles for breath when sleeping)                      | Y <input type="checkbox"/> N <input type="checkbox"/> Unk <input type="checkbox"/> |
| Polycystic ovary syndrome (PCOS)                                                                            | Y <input type="checkbox"/> N <input type="checkbox"/> Unk <input type="checkbox"/> |
| Seizures (i.e., shaking fits)                                                                               | Y <input type="checkbox"/> N <input type="checkbox"/> Unk <input type="checkbox"/> |
| Skin problems (i.e., acne, flaking skin, rashes, hives)                                                     | Y <input type="checkbox"/> N <input type="checkbox"/> Unk <input type="checkbox"/> |
| Snores when sleeping                                                                                        | Y <input type="checkbox"/> N <input type="checkbox"/> Unk <input type="checkbox"/> |
| Depression                                                                                                  | Y <input type="checkbox"/> N <input type="checkbox"/> Unk <input type="checkbox"/> |
| Metabolic syndrome                                                                                          | Y <input type="checkbox"/> N <input type="checkbox"/> Unk <input type="checkbox"/> |
| Pre-Diabetes                                                                                                | Y <input type="checkbox"/> N <input type="checkbox"/> Unk <input type="checkbox"/> |
| Asthma                                                                                                      | Y <input type="checkbox"/> N <input type="checkbox"/> Unk <input type="checkbox"/> |
| Fatty Liver Disease                                                                                         | Y <input type="checkbox"/> N <input type="checkbox"/> Unk <input type="checkbox"/> |
| Hirsutism (excessive hairiness in girls where you wouldn't normally expect it i.e. face, back and forearms) | Y <input type="checkbox"/> N <input type="checkbox"/> Unk <input type="checkbox"/> |
| Cardiovascular disease                                                                                      | Y <input type="checkbox"/> N <input type="checkbox"/> Unk <input type="checkbox"/> |

**Social Economics** – Please provide the following information. Tick one option for each question.

**What is the highest level of education you have completed?**

|                                                                                |                          |
|--------------------------------------------------------------------------------|--------------------------|
| University or college or equivalent                                            | <input type="checkbox"/> |
| Intermediate between secondary level and university (e.g. technical training ) | <input type="checkbox"/> |
| Secondary School                                                               | <input type="checkbox"/> |
| Primary School only (or less)                                                  | <input type="checkbox"/> |

**In what occupational capacity are you presently working or (if no longer working) in what occupation did you last work?**

|                                                            |                          |
|------------------------------------------------------------|--------------------------|
| Laborer                                                    | <input type="checkbox"/> |
| Self-employed                                              | <input type="checkbox"/> |
| Employee                                                   | <input type="checkbox"/> |
| Civil Servant (including judges and professional soldiers) | <input type="checkbox"/> |
| Other: trainees, students, conscripts, etc.                | <input type="checkbox"/> |
| Never worked                                               | <input type="checkbox"/> |
| Unemployed                                                 | <input type="checkbox"/> |

**PERI-NATAL HISTORY** – Please provide the following information. Tick ‘Unk’ for cases when the information is not available.

|                                                                                   |                                                                                                                                                                                              |
|-----------------------------------------------------------------------------------|----------------------------------------------------------------------------------------------------------------------------------------------------------------------------------------------|
| What was the participant’s birth weight?                                          | <input type="text"/> <input type="text"/> . <input type="text"/> <input type="text"/> lbs.<br>OR<br><input type="text"/> <input type="text"/> . <input type="text"/> <input type="text"/> kg |
| What was the participant’s gestational period?                                    | Weeks<br>Unk <input type="checkbox"/>                                                                                                                                                        |
| How many pregnancies has the biological mother had?                               | Unk <input type="checkbox"/>                                                                                                                                                                 |
| Which pregnancy was the participant?                                              | Unk <input type="checkbox"/>                                                                                                                                                                 |
| Has the biological mother had gestational diabetes (GDM)?                         | Y <input type="checkbox"/> N <input type="checkbox"/> Unk <input type="checkbox"/>                                                                                                           |
| If <b>YES</b> , during how many of her pregnancies did she had GDM?               |                                                                                                                                                                                              |
| Did she have GDM when pregnant with the participant?                              | Y <input type="checkbox"/> N <input type="checkbox"/> Unk <input type="checkbox"/>                                                                                                           |
| Did she breastfeed the participant?                                               | Y <input type="checkbox"/> N <input type="checkbox"/> Unk <input type="checkbox"/>                                                                                                           |
| If <b>YES</b> , for how long did she breastfeed the participant?                  | Weeks      Months<br>Unk <input type="checkbox"/>                                                                                                                                            |
| Was the participant conceived by IVF?                                             | Y <input type="checkbox"/> N <input type="checkbox"/> Unk <input type="checkbox"/>                                                                                                           |
| Is the participant a twin?                                                        | Y <input type="checkbox"/> N <input type="checkbox"/> Unk <input type="checkbox"/>                                                                                                           |
| Did the biological mother smoke during her pregnancy with the participant?        | Y <input type="checkbox"/> N <input type="checkbox"/> Unk <input type="checkbox"/>                                                                                                           |
| Did the biological father smoke during the gestational period of the participant? | Y <input type="checkbox"/> N <input type="checkbox"/> Unk <input type="checkbox"/>                                                                                                           |
| What age was the biological mother when pregnant with the participant?            | Years                                                                                                                                                                                        |

**ANTHROPOMETRIC MEASURES** – Please record the following information.

|                         |                                                                                                               |
|-------------------------|---------------------------------------------------------------------------------------------------------------|
| Height                  | <input type="text"/> <input type="text"/> <input type="text"/> <input type="text"/> . <input type="text"/> cm |
| Weight                  | <input type="text"/> <input type="text"/> <input type="text"/> <input type="text"/> . <input type="text"/> kg |
| Waist circumference     | <input type="text"/> <input type="text"/> <input type="text"/> <input type="text"/> . <input type="text"/> cm |
| Neck circumference      | <input type="text"/> <input type="text"/> . <input type="text"/> cm                                           |
| Upper arm circumference | <input type="text"/> <input type="text"/> . <input type="text"/> cm                                           |
| Body fat                | <input type="text"/> <input type="text"/> . <input type="text"/> %                                            |
| Fat-free mass           | <input type="text"/> <input type="text"/> <input type="text"/> <input type="text"/> . <input type="text"/> kg |
| Muscle mass             | <input type="text"/> <input type="text"/> <input type="text"/> <input type="text"/> . <input type="text"/> kg |
| Visceral rating         | <input type="text"/> <input type="text"/>                                                                     |

**BLOOD PRESSURE** – Please record the following information.

|                  |                                                                            |                                                                             |      |              |                                                                |     |
|------------------|----------------------------------------------------------------------------|-----------------------------------------------------------------------------|------|--------------|----------------------------------------------------------------|-----|
| Blood pressure 1 | <input type="text"/> <input type="text"/> <input type="text"/><br>systolic | <input type="text"/> <input type="text"/> <input type="text"/><br>diastolic | mmHg | Heart rate 1 | <input type="text"/> <input type="text"/> <input type="text"/> | bpm |
| Blood pressure 2 | <input type="text"/> <input type="text"/> <input type="text"/><br>systolic | <input type="text"/> <input type="text"/> <input type="text"/><br>diastolic | mmHg | Heart rate 2 | <input type="text"/> <input type="text"/> <input type="text"/> | bpm |
| Blood pressure 3 | <input type="text"/> <input type="text"/> <input type="text"/><br>systolic | <input type="text"/> <input type="text"/> <input type="text"/><br>diastolic | mmHg | Heart rate 3 | <input type="text"/> <input type="text"/> <input type="text"/> | bpm |

**Biochemistry** – Please provide the following information.

Time taken

HH:MM

Is the participant fasting?

No

☐

Yes

☐

|                    |                                                       |                                                                         |                                                                    |
|--------------------|-------------------------------------------------------|-------------------------------------------------------------------------|--------------------------------------------------------------------|
| HbA1c              | Y <input type="checkbox"/> N <input type="checkbox"/> | <input type="text"/> <input type="text"/> <input type="text"/> mmol/mol | <input type="text"/> <input type="text"/> . <input type="text"/> % |
| Glucose            | Y <input type="checkbox"/> N <input type="checkbox"/> | <input type="text"/> <input type="text"/> . <input type="text"/> mmol/L |                                                                    |
| Triglycerides      | Y <input type="checkbox"/> N <input type="checkbox"/> | <input type="text"/> <input type="text"/> . <input type="text"/> mmol/L |                                                                    |
| Total cholesterol  | Y <input type="checkbox"/> N <input type="checkbox"/> | <input type="text"/> <input type="text"/> . <input type="text"/> mmol/L |                                                                    |
| HDL-c              | Y <input type="checkbox"/> N <input type="checkbox"/> | <input type="text"/> <input type="text"/> . <input type="text"/> mmol/L |                                                                    |
| LDL-c (calculated) | Y <input type="checkbox"/> N <input type="checkbox"/> | <input type="text"/> <input type="text"/> . <input type="text"/> mmol/L |                                                                    |

**ADDITIONAL COMMENTS** – please use the space below to record any additional important or clinically significant information. Please document the reason why any measurements have been missed or omitted.

| <b><u>Activity</u></b>    | <b><u>Completed by (Please<br/>initial)</u></b> |
|---------------------------|-------------------------------------------------|
| <b>Ethnicity</b>          |                                                 |
| <b>Family History</b>     |                                                 |
| <b>Medical History</b>    |                                                 |
| <b>Social economics</b>   |                                                 |
| <b>Peri-Natal History</b> |                                                 |
| <b>Anthropometrics</b>    |                                                 |
| <b>Blood Pressure</b>     |                                                 |
| <b>Biochemistry</b>       |                                                 |

PHEN\_CRF\_v1.0\_10/06/2015

Participant Study ID: PHEN - ☐ - ☐☐☐

Checked by: \_\_\_\_\_ Date: \_\_\_\_\_

BLANK

## Additional Questions – For completion by HCP – Associated Risk factors

### Section 1: Overweight & Sedentary

Is your child's body mass index (BMI) above the 85<sup>th</sup> percentile? **Yes** **No**

*Please use the charts and instructions provided to answer this question*

Does your child watch TV/play computer games for more than 2 hours a day? **Yes** **No**

### Section 2: Other risk factors

Look at the table below and find your child's age and gender. Measure their waist circumference (using the guide below). Is the result higher than the measurement given in the table? **Yes** **No**

*For example if your son is 12 and his waist measurement is 85 cm please answer YES.*

| Gender        | Age | Measurement (cm) |
|---------------|-----|------------------|
| <b>Male</b>   | 12  | 84.5             |
|               | 13  | 87.9             |
|               | 14  | 91.3             |
| <b>Female</b> | 12  | 81.2             |
|               | 13  | 84.1             |
|               | 14  | 86.9             |

**Has your child been diagnosed with any of the following?**

Acanthosis Nigricans **Yes** **No**

(Dark patchy skin in places such as on the neck, groin or underarm)

Pre-diabetes **Yes** **No**

Fatty liver disease **Yes** **No**

Polycystic ovary syndrome **Yes** **No**

**Has your child been told by they have any three of the factors below or that they have metabolic syndrome?** **Yes** **No**

- High blood pressure
- High cholesterol
- Low HDL cholesterol
- High triglycerides
- High blood glucose levels, but not diagnosed with diabetes

**Does your child have a first family history of diabetes? This includes only close blood relatives such as mother, father, sister or brother.**

**Yes      No**

**Is your child of non-white ethnicity?**

**Yes      No**

**Did your child gain more 2 lb (908 grams) a month between 0-4 months old?**

**Yes      No**

**Does your child have a high sugar intake?**

*For example more than 1.5 cans (or 532mls) of fizzy pop/ fruit juice a day?*

**Yes      No**

**"Small for gestational age".** Please look at the tables bellow. Think back to how many weeks was your child when she or he was born and the weight that she or he had.

After looking the tables please answer to the question:

Did your child (girl or boy) have a weight under the weight corresponding to the week pregnant?

**Yes      No**

**Girls**

| Number of weeks pregnant | Babies weight in grams |
|--------------------------|------------------------|
| 26 weeks                 | 580,12                 |
| 27 weeks                 | 660,9                  |
| 28 weeks                 | 688,98                 |
| 29 weeks                 | 695,08                 |
| 30 weeks                 | 838,53                 |
| 31 weeks                 | 966,26                 |
| 32 weeks                 | 1001,8                 |
| 33 weeks                 | 1304,49                |
| 34 weeks                 | 1544,72                |
| 35 weeks                 | 1643,28                |
| 36 weeks                 | 1736,46                |
| 37 weeks                 | 1976,26                |
| 38 weeks                 | 2229,42                |
| 39 weeks                 | 2440,84                |
| 40 weeks                 | 2535,3                 |
| 41 weeks                 | 2546,37                |
| 42 weeks                 | 2702,72                |

**Boys**

| Number of weeks pregnant | Babies weight in grams |
|--------------------------|------------------------|
| 26 weeks                 | 582,81                 |
| 27 weeks                 | 642,83                 |
| 28 weeks                 | 682,19                 |
| 29 weeks                 | 844,23                 |
| 30 weeks                 | 972,44                 |
| 31 weeks                 | 1115,43                |
| 32 weeks                 | 1182,73                |
| 33 weeks                 | 1399,56                |
| 34 weeks                 | 1605,18                |
| 35 weeks                 | 1738,47                |
| 36 weeks                 | 1937,52                |
| 37 weeks                 | 2019,78                |
| 38 weeks                 | 2339,03                |
| 39 weeks                 | 2506,71                |
| 40 weeks                 | 2601,94                |
| 41 weeks                 | 2678,09                |
| 42 weeks                 | 2746,55                |

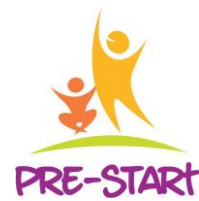

**Did your child weigh less than the weight given for the number of weeks you/their biological mother was pregnant for (i.e. were they small for their gestational age?)?** **Yes No**

*i.e. if your child was carried for 32 weeks and their birth weight was less than 3.75 lb (1702 grams) you would answer yes*

**Was your child never feed on breast milk?** **Yes No**

**Is either parent/guardian obese? Defined as having a BMI greater than 30kg/m<sup>2</sup> if White European or 27kg/m<sup>2</sup> for other ethnicity which can be calculated using the BMI calculator included?** **Yes No**

*Please see BMI calculator*
